# Supplementary material
Source: Springer Nature journal article supplement (https://www.springermedizin.de/resource/supplementary/13045_2013_366_MOESM2_ESM.pdf/9661264)

**A** WT1-specific and HLA-A\*24:02  
-restricted CTL-transferred mouse

Control CTLs-transferred mouse

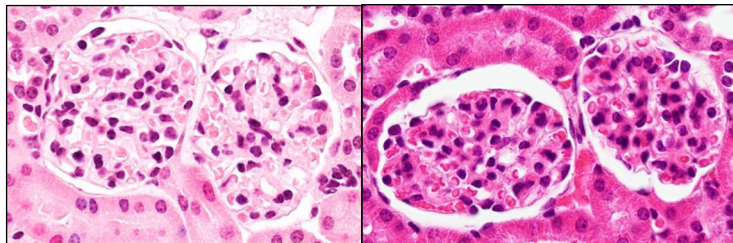

**B**

Day 1

Day 3

Day 6

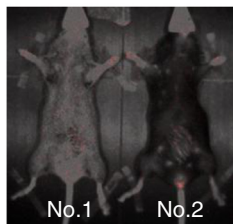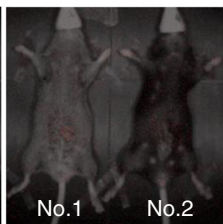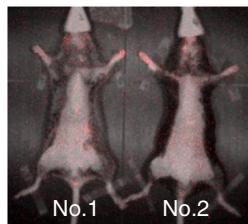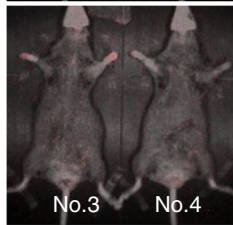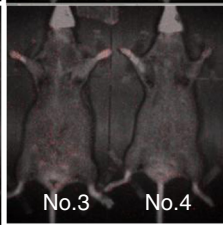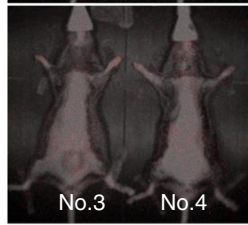

Supplement: MOESM2 [file 9661264]
